# Supplementary material
Source: PubMed Central journal article supplement (PMC10183099)

## Supplementary files

# Transcriptome- and proteome-oriented identification of dysregulated eIF4G, STAT3, and Hippo pathways altered by *PIK3CA*<sup>H1047R</sup> in HER2/ER-positive breast cancer

Feixiong Cheng,<sup>1,†,#</sup> Junfei Zhao,<sup>1,2,#</sup> Ariella B. Hanker,<sup>3</sup> Monica Red Brewer,<sup>3</sup>  
Carlos L. Arteaga,<sup>3,4,5,\*</sup> Zhongming Zhao<sup>1,2,4,5\*</sup>

<sup>1</sup>Department of Biomedical Informatics, Vanderbilt University Medical Center, Nashville, TN 37203

<sup>2</sup>Center for Precision Health, School of Biomedical Informatics, The University of Texas Health Science Center at Houston, Houston, TX 77030, USA

<sup>3</sup>Department of Medicine, Vanderbilt-Ingram Cancer Center, Vanderbilt University, Nashville, TN 37232

<sup>4</sup>Department of Cancer Biology, Vanderbilt-Ingram Cancer Center, Vanderbilt University, Nashville, TN 37232

<sup>5</sup>Breast Cancer Research Program, Vanderbilt-Ingram Cancer Center, Vanderbilt University, Nashville, TN 37232

†Present Address: Center for Cancer Systems Biology (CCSB), Dana-Farber Cancer Institute, Harvard Medical School, Boston, MA 02215, USA, and Center for Complex Networks Research, Northeastern University, Boston, MA 02115, USA.

#These authors contributed equally to this work.

\*Address correspondence to: carlos.arteaga@vanderbilt.edu (C.L.A), Department of Medicine and Cancer Biology, Vanderbilt-Ingram Cancer Center, Vanderbilt University, Nashville, TN 37232, Phone: (615) 936-1919, Fax: (615) 343-7602;

zhongming.zhao@vanderbilt.edu (Z.Z), Department of Biomedical Informatics, Vanderbilt University Medical Center, Nashville, TN 37203, Phone: (615) 343-9158, Fax: (615) 936-8545

**Supplementary Table S1.** The significantly up-regulated genes for 10 subgroups characterized by *PIK3CA*<sup>H1047R</sup> or *PIK3CA*<sup>E545K</sup> in HER2<sup>+</sup>/ER<sup>+</sup> breast cancer patients.

**Supplementary Table S2.** The 52 well-annotated gene signatures and their enrichment analysis results.

**Supplementary Table S3.** Lists of up-/down-regulated proteins in four groups:  
HER2<sup>+</sup>*PIK3CA*<sup>H1047R</sup> versus HER2<sup>+</sup>*PIK3CA*<sup>WT</sup>, HER2<sup>+</sup>*PIK3CA*<sup>E545K</sup> versus  
HER2<sup>+</sup>*PIK3CA*<sup>WT</sup>, ER<sup>+</sup>*PIK3CA*<sup>H1047R</sup> versus ER<sup>+</sup>*PIK3CA*<sup>WT</sup>, and ER<sup>+</sup>*PIK3CA*<sup>E545K</sup> versus  
ER<sup>+</sup>*PIK3CA*<sup>WT</sup>.

**Supplementary Figure S1. Kaplan-Meier overall survival rates for HER2+ or ER+ breast cancer patients with or without two PIK3CA hotspot mutations (H1047R and E545K) using TCGA data. All P values of Kaplan-Meier survival analysis were performed using a log-rank test.**

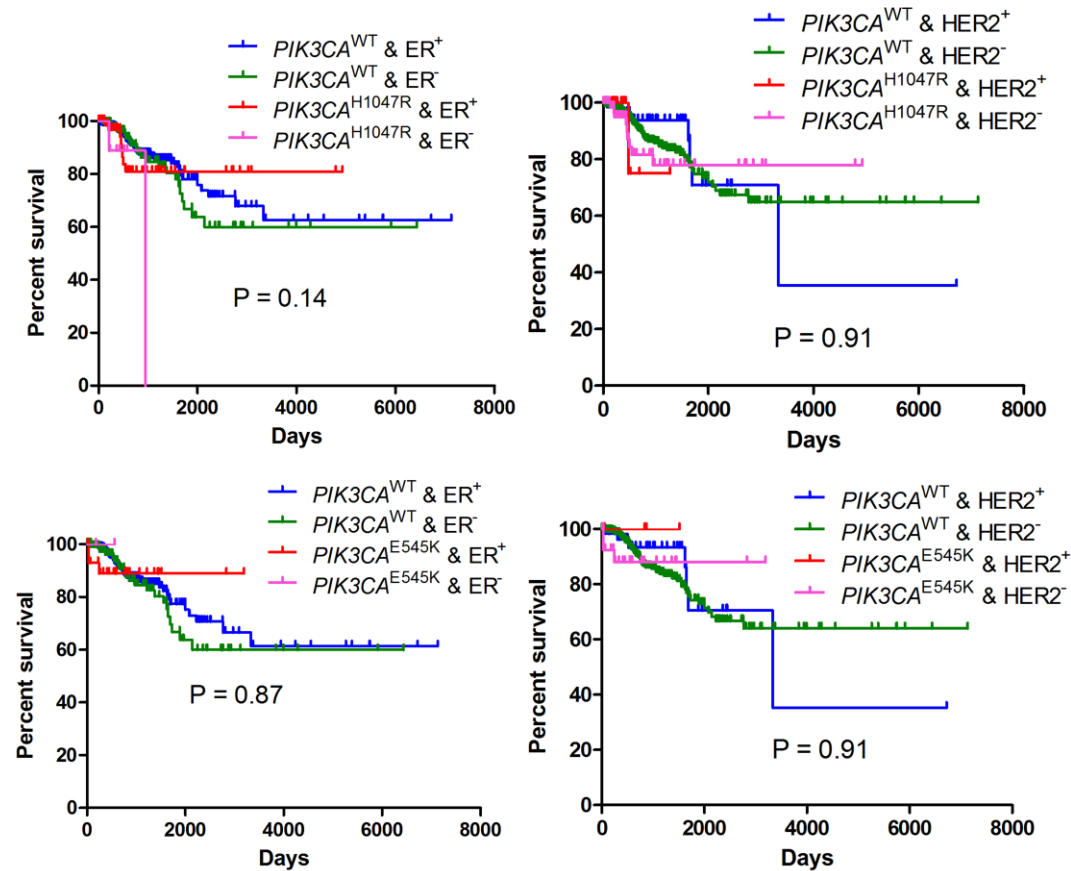

**Supplementary Figure S2. Correlation analyses for the protein expression level of YAP<sub>pS127</sub> with protein expression of BCL-XL and mRNA expression level of TEAD1 and CTGF in ER+/PIK3CA-H1047R breast cancer patients. R was calculated by Pearson correlation coefficient and P-value was calculated by F-statistics.**

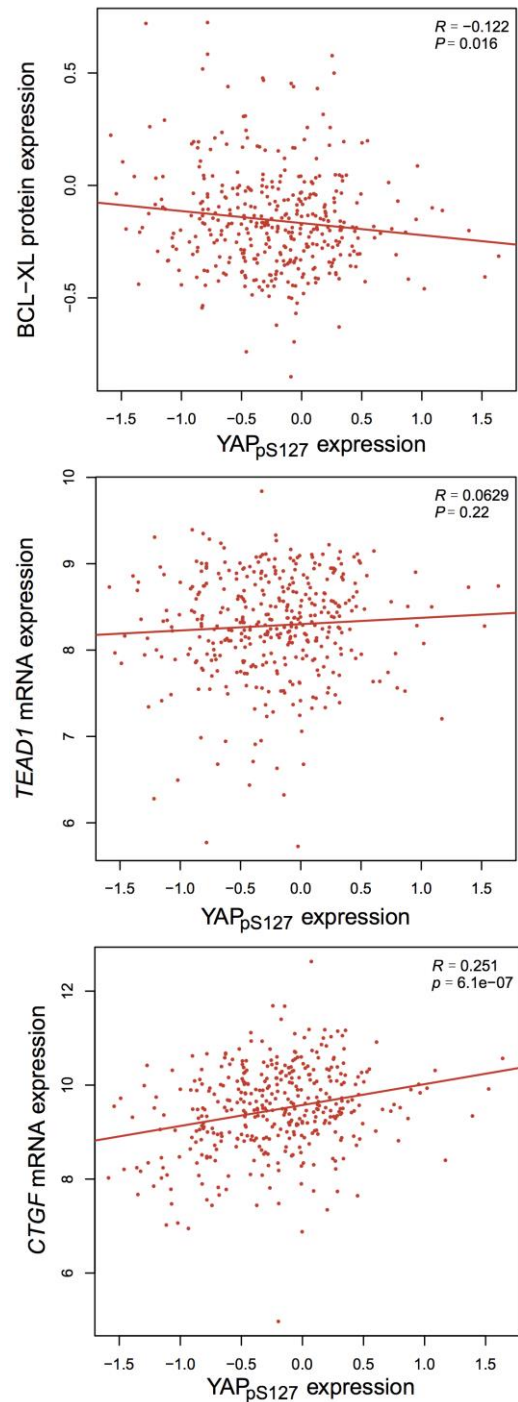

**Supplementary Figure S3. Box plots showing the representative differential proteins/phosphoproteins in HER2+PIK3CA<sup>E545K</sup> versus HER2+PIK3CA<sup>WT</sup>**

**subgroups.** Top 5 up-regulated and down-regulated proteins in HER2+PIK3CA<sup>E545K</sup> patients versus HER2+PIK3CA<sup>WT</sup> subgroup were shown. The detailed data are provided in Supplementary Table S3.

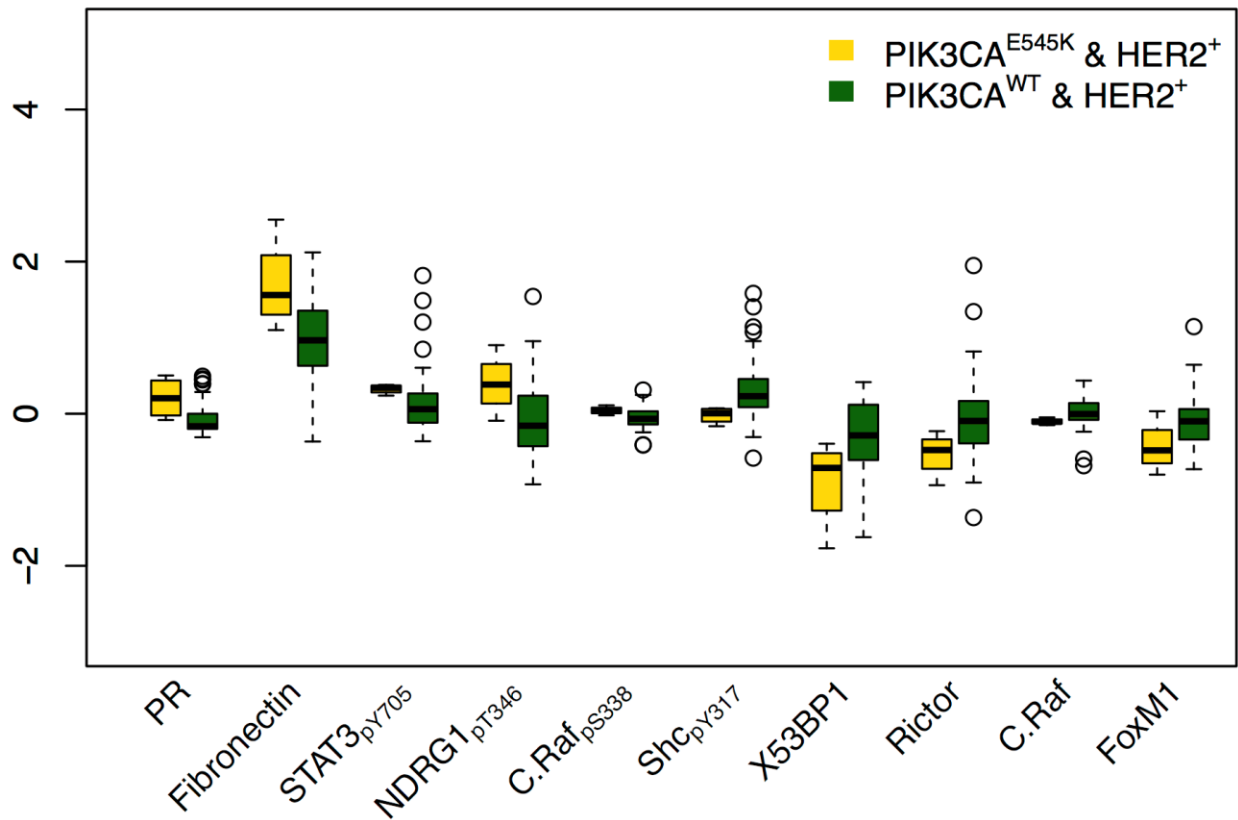

**Supplementary Figure S4. Box plots showing the representative differential proteins/phosphoproteins in ER+PIK3CA<sup>E545K</sup> versus ER+PIK3CA<sup>WT</sup> subgroups.**

Top 5 up-regulated and down-regulated proteins in ER+PIK3CA<sup>E545K</sup> patients versus ER+PIK3CA<sup>WT</sup> subgroup were shown. The detailed data are provided in Supplementary Table S3.

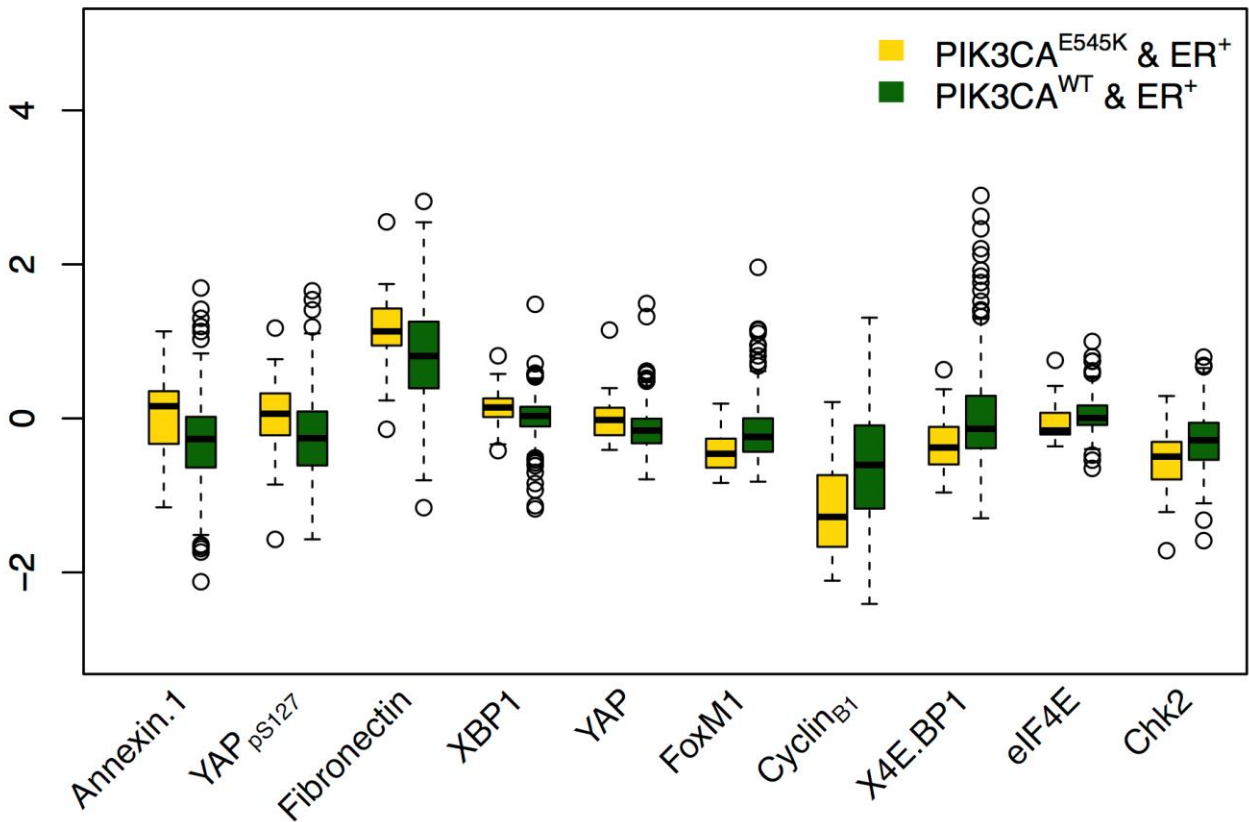

Supplement: NIHMS1887940-supplement-1.pdf [file NIHMS1887940-supplement-1.pdf]
